# Supplementary material
Source: PubMed Central journal article supplement (PMC5707186)

Supplemental Figure S1

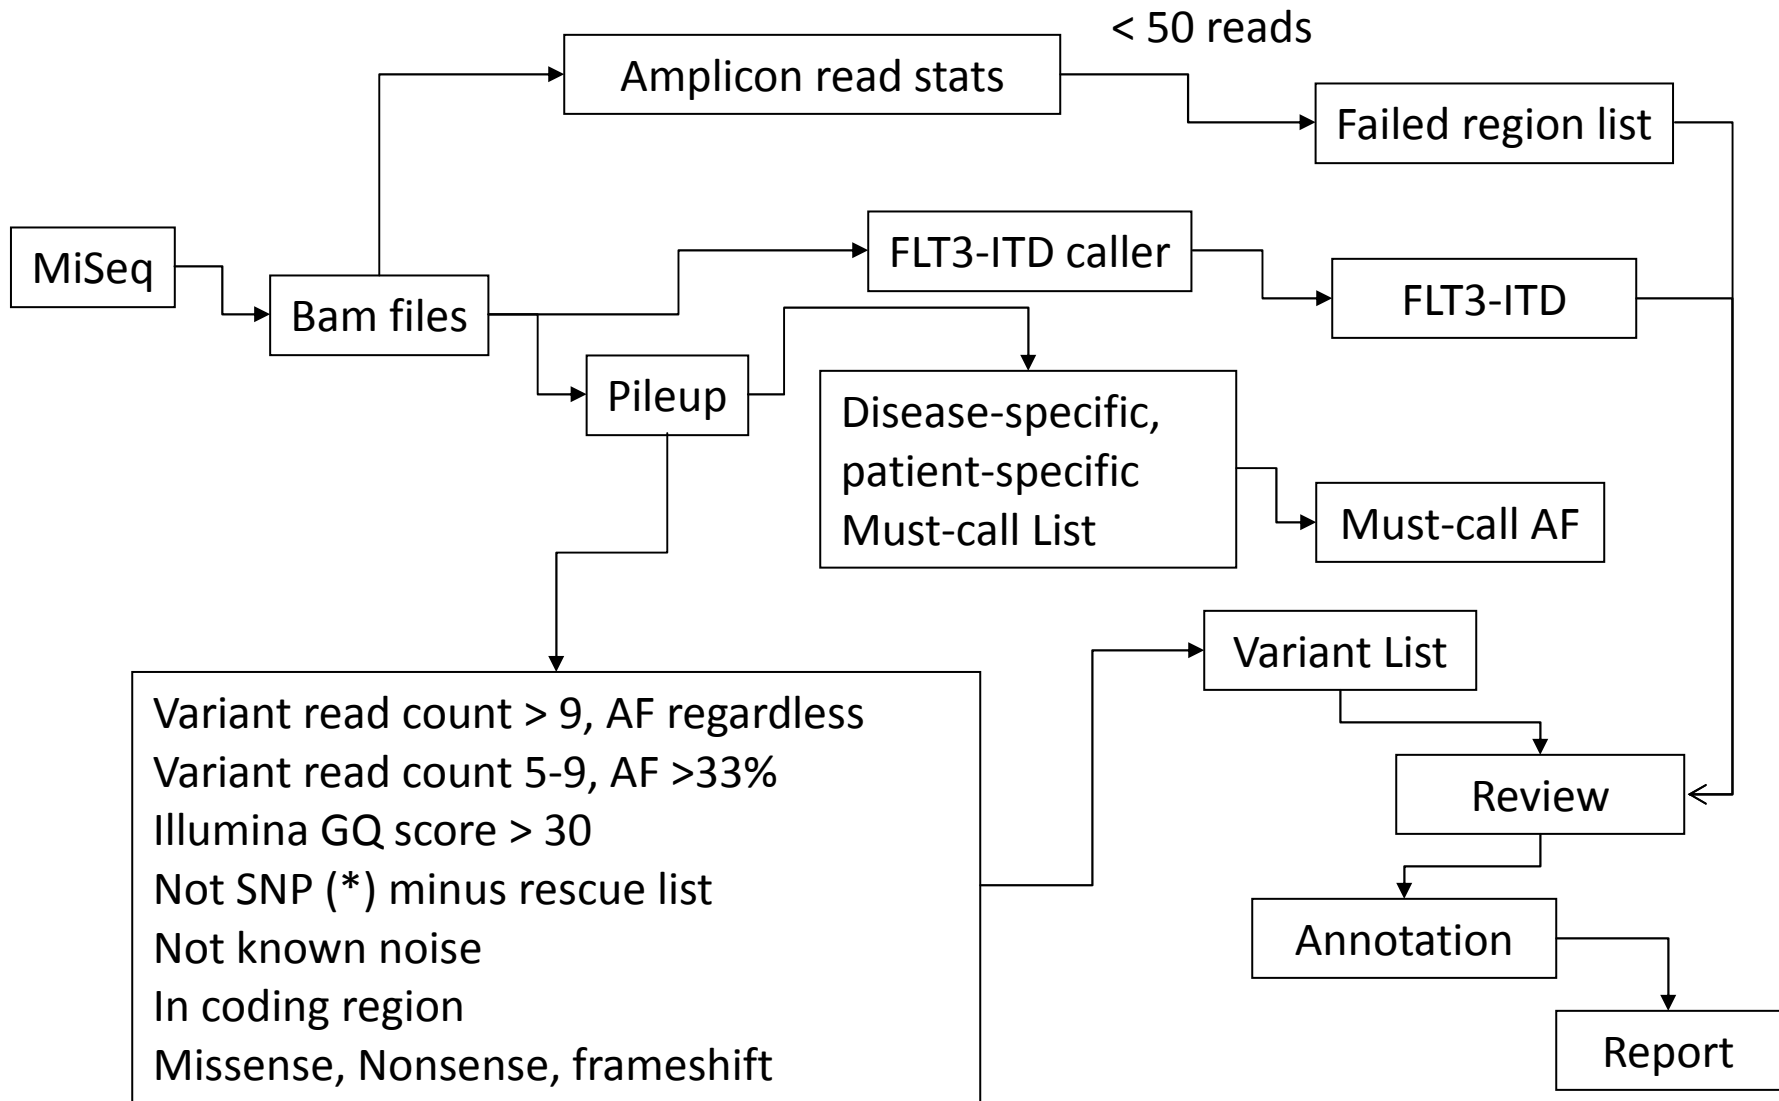

Supplement: mmc2.pdf [file mmc2.pdf]

# Average Coverage of Amplicons for Control DNA (N=6)

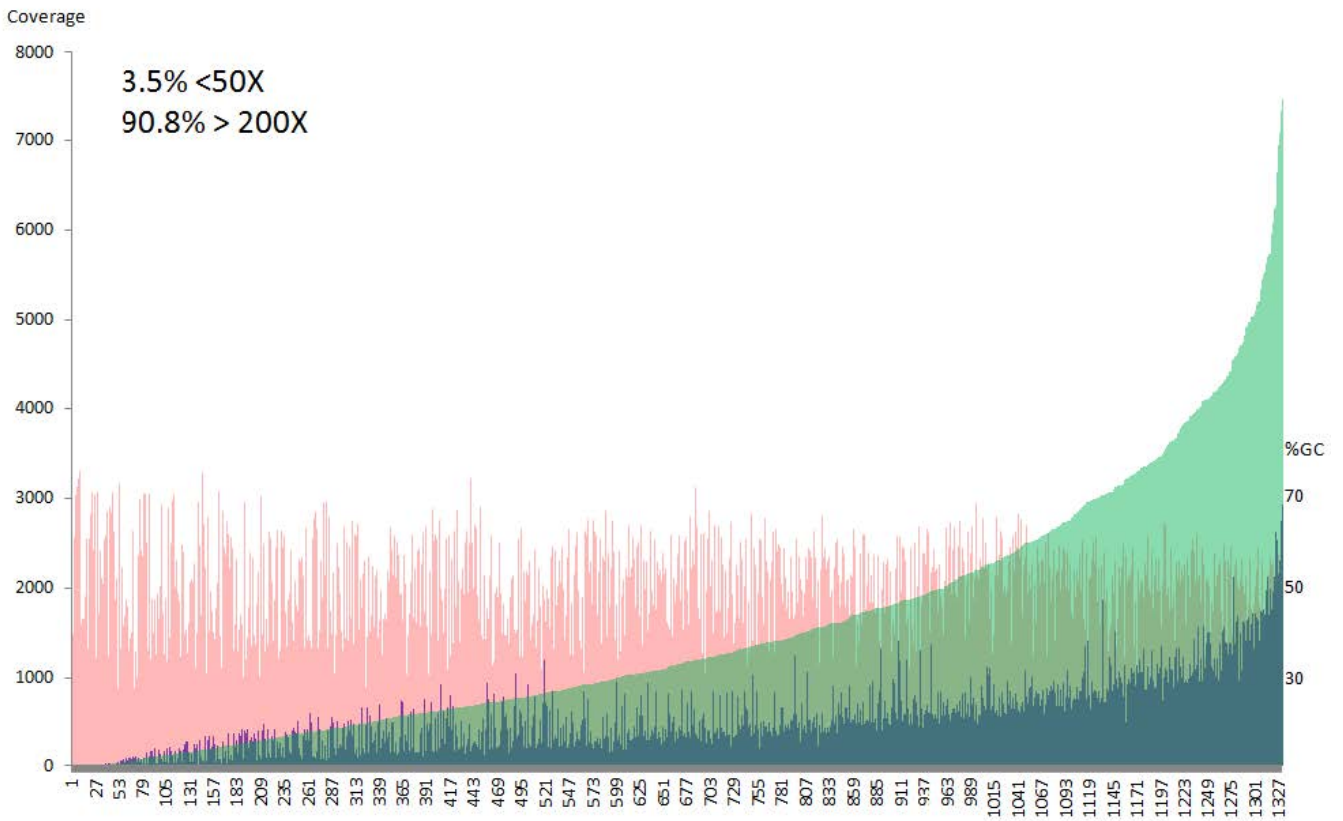

Supplement: mmc3.pdf [file mmc3.pdf]
